# Supplementary material for: Cutaneous pigmentation modulates skin sensitivity via tyrosinase-dependent dopaminergic signalling
Source: PubMed Central journal article supplement (PMC5569050; doi:10.1038/s41598-017-09682-4), 2017-08-23
Supplement: 41598_2017_9682_MOESM1_ESM.pdf [file 41598_2017_9682_MOESM1_ESM.pdf]

## Supplementary figures

### Cutaneous pigmentation modulates skin sensitivity via tyrosinase-dependent dopaminergic signalling

Kentaro Ono, Chi T Viet, Yi Ye, Dongmin Dang, Suzuro Hitomi, Takashi Toyono, Kiyotoshi Inenaga, John C. Dolan & Brian L. Schmidt

**Table S1 | Characteristics of the studies included in the meta-analysis**

| Study name          | Published year | Age range (mean) | Sex         | Race/ethnicity | Sample size (dark/light) | Pain measurements     |
|---------------------|----------------|------------------|-------------|----------------|--------------------------|-----------------------|
| Sheffield (22)      | 2000           | 20-73 (38.0)     | F/M mixture | AA, W          | 51 (24/27)               | HPI                   |
| Yosipovitch (23)    | 2004           | 19-59 (35.6)     | F/M mixture | Chi, I, M      | 49 (29/20)               | HPTh                  |
| Campbell (24)       | 2005           | NR (21.1)        | F/M mixture | AA, W          | 120 (62/58)              | HPI, HPTh, HPTo       |
| Watson (25)         | 2005           | Adults (NR)      | M only      | SA, WB         | 40 (20/20)               | HPI, HPTh             |
| Mechlin (26)        | 2007           | 18-47 (NR)       | F and M     | AA, NHW        | 84 (45/39)               | HPTh, HPTo            |
| Rahim-Williams (27) | 2007           | 18-53 (24.0)     | F and M     | AA, H, NHW     | 206 (124/82)             | HPTh, HPTo, PPTH      |
| Grewen (28)         | 2008           | NR (27.4)        | F only      | AA, NHW        | 48 (25/23)               | HPTh, HPTo            |
| Wang (29)           | 2010           | 19-47 (NR)       | F/M mixture | AA, H, C, EA   | 40 (20/20)               | HPTh                  |
| Sibille (30)        | 2011           | 18-45 (23.1)     | F/M mixture | AA, NHW        | 142 (23/119)             | HPI, HPTh, HPTo, PPTH |
| Hastie (31)         | 2012           | 18-54 (23.7)     | F/M mixture | AA, H, NHW     | 247 (160/87)             | HPI, HPTo, HPTh, PPTH |
| Riley III (32)      | 2014           | 45-76 (57.6)     | F/M mixture | NHW, NHB       | 191 (53/138)             | HPI, HPTo, HPTh, PPTH |

Mean age (in years): Age range: NR, not reported. Sex: F, females; M, males. Race/ethnicity: AA, African Americans; C, Caucasians; Chi, Chinese; EA, East Asians; H, Hispanics; I, Indians; M, Malays; NHW, non-Hispanic Whites; SA, South Asians; W, Whites; WB, White British. Sample size: Dark, dark skin group including AA, H, I, M and SA; Light, light skin group including C, Chi, EA, NHW, W and WB, based on native skin color distributions (21). Pain measurement: HPI, heat pain intensity at 48 or 49°C; HPTh, heat pain threshold; HPTo, heat pain tolerance; PPTH, pressure pain threshold in trapezius and/or masseter.

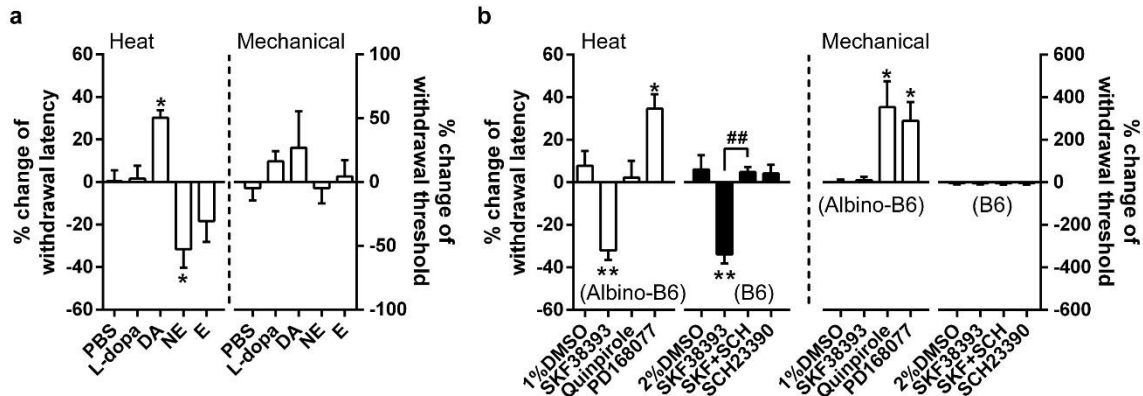

**Figure S1 | Acute effects of L-dopa, catecholamines, dopamine receptor agonists and antagonists on cutaneous sensitivities in mice.** (a) Percent changes of withdrawal latency to heat stimulation (heat sensitivity) 1 hour following injections of PBS, L-dopa, DA, NE and E and threshold to von Frey stimulation (mechanical sensitivity) in 2-3 hours after injections of the same agents in albino-B6. \* $P < 0.05$ , vs PBS, in Dunnett's multiple *post hoc* test, following one-way ANOVA test. (b) Percent changes of withdrawal latency to heat stimulation and mechanical withdrawal threshold from 30-40 min after injections of dopamine receptor agonists and antagonists in B6 and albino-B6. \*  $P < 0.05$ , \*\* $P < 0.01$ , vs controls (1% or 2% DMSO in PBS), in Dunnett's multiple *post hoc* test, following one-way ANOVA test. ## $P < 0.01$ , vs a SKF38393-injected group, in *t*-test. Each experimental group,  $n = 5$ . All bars show mean  $\pm$  s.e.m.. The analyses present % change against pre-values (before drug injections), which are presented in Fig. 3.

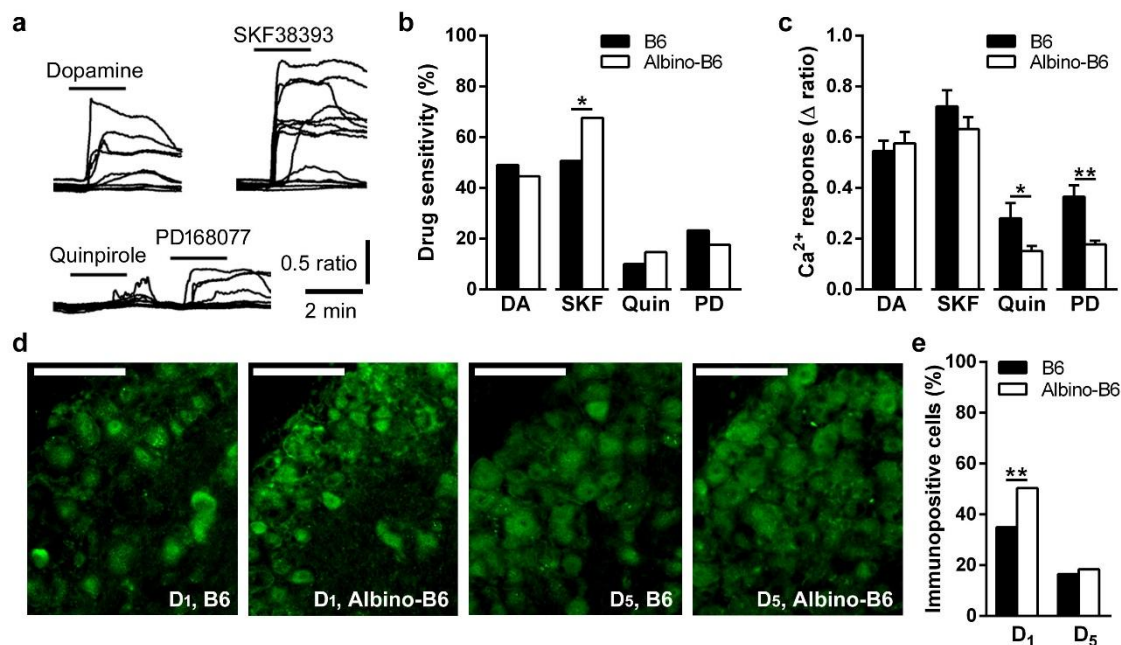

**Figure S2 | Dopamine receptor expression in cultured TG neurons of B6 and albino-B6.** (a) Ca<sup>2+</sup> responses by dopamine and receptor-specific agonists; DA concentration was 10  $\mu$ M. The D<sub>1/5</sub> agonist SKF38393 (SKF), the D<sub>2/3</sub> agonist quinpirole (Quin) and the D<sub>4</sub> agonist PD168077 (PD) at 30  $\mu$ M. Quin and PD were applied to the same neurons. (b) Sensitivities to dopaminergic agents. DA, SKF, Quin and PD in B6: total n=75/153, 45/89, 9/90 and 21/90, respectively. DA, SKF, Quin and PD in albino-B6: total n=70/157, 69/102, 15/102 and 18/102, respectively. \**P*<0.05, in Fisher's test. (c) Peak of dopaminergic agent-induced Ca<sup>2+</sup> responses. \**P*<0.05, \*\**P*<0.01, in *t*-test. All bars show mean  $\pm$  s.e.m.. (d) Immunoreactivities to D<sub>1</sub> and D<sub>5</sub> dopamine receptor in the mouse TG neurons. Scale bar, 100  $\mu$ m. (e) Cell populations showing D<sub>1</sub> and D<sub>5</sub> immunoreactivities in total neurons of B6 (n=86/246 and 55/171, respectively) and albino-B6 (n=148/294 and 73/233, respectively). \*\**P*<0.01, in Fisher's test.

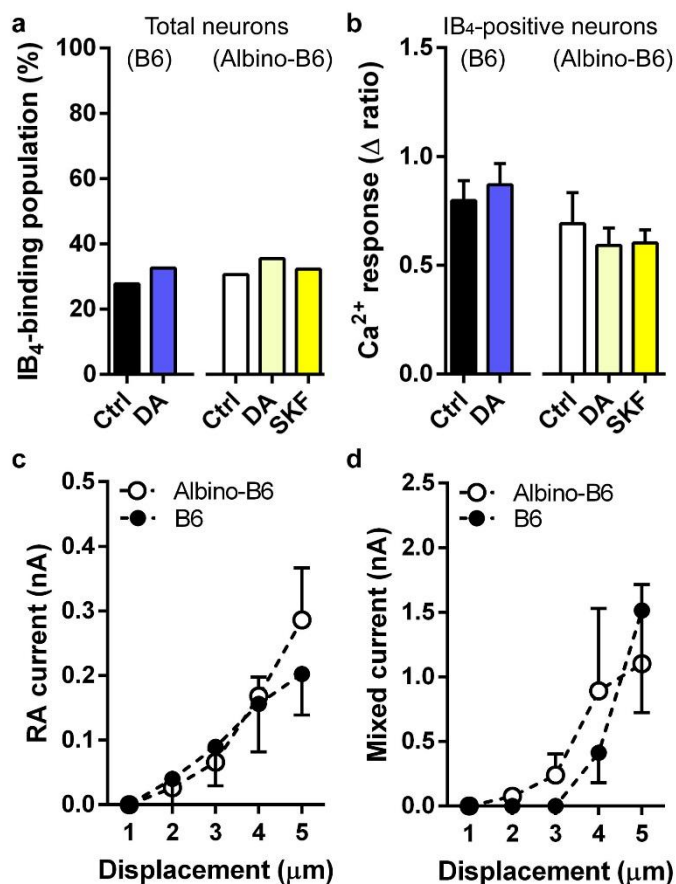

**Figure S3 | Effects of dopaminergic stimulations on capsaicin-induced Ca<sup>2+</sup> responses and mechanically-activated currents in cultured TG neurons.** (a) IB<sub>4</sub> binding cell populations. Ctrl and DA in B6: total n=35/126 and 45/138, respectively. Ctrl, DA and SKF in albino-B6: total n=30/98, 55/155 and 40/124, respectively. (b) Peak of capsaicin-induced Ca<sup>2+</sup> responses in IB<sub>4</sub>-positive neurons. Ctrl and DA in B6: n=27 and 29, respectively. Ctrl, DA and SKF in albino-B6: total n=12, 37 and 23, respectively. (c) Displacement-dependency of rapidly-adapted (RA) currents. (d) Displacement-dependency of mixed currents with RA and slowly-adapted currents. All bars and plots show mean ± s.e.m..
